# Supplementary material for: Identifying Risk of Viral Failure in Treated HIV-Infected Patients Using Different Measures of Adherence: The Antiretroviral Therapy Cohort Collaboration
Source: MDPI journal article supplement (doi:10.3390/jcm7100328), 2018-10-05
Supplement: s1 [file s1]

**Web Table 1:** Odds ratios (95% CI) for failure according to adherence and age.

| Covariate                         | N    | Age 16-29            | Age 30-39           | Age 40-49           | Age 50+            |
|-----------------------------------|------|----------------------|---------------------|---------------------|--------------------|
| Cohorts with pharmacy refill data | 7156 |                      |                     |                     |                    |
| Adherence                         |      |                      |                     |                     |                    |
| Low                               | 667  | 52.5<br>(17.7,156.0) | 32.9<br>(19.3,56.3) | 23.3<br>(15.3,35.5) | 15.5<br>(9.3,25.9) |
| Medium                            | 3519 | 6.3<br>(3.7,10.8)    | 5.2<br>(4.0,6.7)    | 4.3<br>(3.5,5.3)    | 3.6<br>(2.8,4.6)   |
| High*                             | 2970 | 1                    | 1                   | 1                   | 1                  |
| P for interaction=0.0612          |      |                      |                     |                     |                    |
| Cohorts with self-report data     | 4533 |                      |                     |                     |                    |
| Adherence                         |      |                      |                     |                     |                    |
| Low                               | 359  | 3.6<br>(2.0,6.4)     | 2.4<br>(1.5,3.9)    | 3.2<br>(1.7,5.9)    | 4.9<br>(2.3,10.5)  |
| Medium                            | 764  | 1.5<br>(0.9,2.6)     | 1.2<br>(0.7,1.8)    | 0.8<br>(0.4,1.6)    | 1.2<br>(0.5,2.6)   |
| High*                             | 3410 | 1                    | 1                   | 1                   | 1                  |
| P for interaction=0.4465          |      |                      |                     |                     |                    |

\* Reference category.

**Web Table 2:** Odds ratios (95% CI) for failure using the cut-offs of ≤500 cp/mL and ≤50 cp/mL.

|           |      | ≤500 cp/mL, N = 11,689 |                     | ≤50 cp/mL, N = 8272 |                   |
|-----------|------|------------------------|---------------------|---------------------|-------------------|
|           |      | Crude                  | Adjusted*           | Crude               | Adjusted*         |
| Covariate | N    | OR (95% CI)            | OR (95% CI)         | OR (95% CI)         | OR (95% CI)       |
| Adherence |      |                        |                     |                     |                   |
| Low       | 1026 | 12.9<br>(11.1,15.0)    | 12.4<br>(10.5,14.7) | 7.8<br>(6.4, 9.3)   | 8.3<br>(6.7,10.3) |
| Medium    | 4283 | 4.6<br>(4.2,5.1)       | 2.9<br>(2.6,3.3)    | 3.2<br>(2.8,3.5)    | 2.3<br>(2.0,2.6)  |
| High      | 6380 | 1                      | 1                   | 1                   | 1                 |

\*adjusted for: cohort, age, gender, CD4 and viral load at ART start, AIDS at ART start, and transmission risk group.

**Web Table 3:** Odds ratios (95% CI) for adherence on viral failure using the cut-off of  $\leq 500$  cp/mL and restricting to data from 2009 onwards,  $N = 885$ .

|           |          | <b>Pharmacy data*</b> |             | <b>Self-report data</b> |               |               |
|-----------|----------|-----------------------|-------------|-------------------------|---------------|---------------|
|           |          | Crude                 | Adjusted**  |                         | Crude         | Adjusted*     |
| Covariate | <i>N</i> | OR (95% CI)           | OR (95% CI) | <i>N</i>                | OR (95% CI)   | OR (95% CI)   |
| Adherence |          |                       |             |                         |               |               |
| Low       | 0        | N/A                   | N/A         | 153                     | 3.1 (1.7,5.6) | 3.0 (1.5,5.9) |
| Medium    | 5        | N/A                   | N/A         | 224                     | 1.4 (0.8,2.7) | 1.1 (0.6,2.3) |
| High      | 2        | N/A                   | N/A         | 501                     | 1             | 1             |

\*There is no variability in viral failure for this subset of data and therefore logistic regression cannot be run. \*\* adjusted for: cohort, age, gender, CD4 and viral load at ART start, AIDS at ART start, and transmission risk group

**Web Table 4:** Odds ratios (95% CI) for adherence on viral failure using the cut-off of  $\leq 500$  cp/mL and restricting to patients still on their baseline regimen,  $N = 9740$ .

|           |          | <b>Pharmacy data</b> |                   | <b>Self-report data</b> |               |               |
|-----------|----------|----------------------|-------------------|-------------------------|---------------|---------------|
|           |          | Crude                | Adjusted*         |                         | Crude         | Adjusted*     |
| Covariate | <i>N</i> | OR (95% CI)          | OR (95% CI)       | <i>N</i>                | OR (95% CI)   | OR (95% CI)   |
| Adherence |          |                      |                   |                         |               |               |
| Low       | 656      | 26.0 (20.9, 32.4)    | 22.9 (18.3, 28.7) | 187                     | 3.0 (2.0,4.6) | 3.7 (2.3,5.9) |
| Medium    | 3430     | 4.4 (3.9, 5.1)       | 3.9 (3.4, 4.4)    | 429                     | 1.0 (0.6,1.5) | 1.0 (0.6,1.6) |
| High      | 2873     | 1                    | 1                 | 2165                    | 1             | 1             |

\*adjusted for: cohort, age, gender, CD4 and viral load at ART start, AIDS at ART start, and transmission risk group

Web Table 5: Description of pharmacy adherence measures when calculated over 3, 6 and 12 months.

|                                       | 3 months | 6 months | 12 months |
|---------------------------------------|----------|----------|-----------|
| Alberta                               |          |          |           |
| N                                     | 490      | 473      | 485       |
| % suppressed                          | 90%      | 90%      | 89%       |
| Median percentage adherence           | 100      | 99       | 100       |
| Among those suppressed                | 100      | 100      | 100       |
| Among those not suppressed            | 72       | 64       | 49        |
| Proportion with $\geq 95\%$ adherence | 71%      | 65%      | 67%       |
| Proportion with 100% adherence        | 51%      | 47%      | 52%       |
| AUROC                                 | 0.7328   | 0.8116   | 0.8577    |
| HOMER                                 |          |          |           |
| N                                     | 2310     | 2246     | 2241      |
| % suppressed                          | 77%      | 76%      | 74%       |
| Median percentage adherence           | 100      | 100      | 100       |
| Among those suppressed                | 100      | 100      | 100       |
| Among those not suppressed            | 86       | 67       | 61        |
| Proportion with $\geq 95\%$ adherence | 79%      | 65%      | 62%       |
| Proportion with 100% adherence        | 78%      | 64%      | 60%       |
| AUROC                                 | 0.7346   | 0.7918   | 0.8548    |
| VACS                                  |          |          |           |
| N                                     | 5175     | 5055     | 4404      |
| % suppressed                          | 65%      | 65%      | 63%       |
| Median percentage adherence           | 99       | 98       | 89        |
| Among those suppressed                | 100      | 100      | 94        |
| Among those not suppressed            | 90       | 81       | 73        |
| Proportion with $\geq 95\%$ adherence | 64%      | 57%      | 39%       |
| Proportion with 100% adherence        | 49%      | 47%      | 28%       |
| AUROC                                 | 0.6544   | 0.6882   | 0.7157    |
| HAVACS                                |          |          |           |
| N                                     | 49       | 51       | 26        |
| % suppressed                          | 57%      | 47%      | 62%       |
| Median percentage adherence           | 97       | 90       | 85        |
| Among those suppressed                | 84       | 87       | 85        |
| Among those not suppressed            | 97       | 90       | 87        |
| Proportion with $\geq 95\%$ adherence | 51%      | 41%      | 38%       |
| Proportion with 100% adherence        | 39%      | 31%      | 27%       |
| AUROC                                 | 0.4294   | 0.4931   | 0.4531    |

Web Table 6: Summary of pharmacy adherence calculation according to self-reported adherence.

| Self-reported adherence in the last 12 months | Pharmacy adherence in the same 12 month period |                  |
|-----------------------------------------------|------------------------------------------------|------------------|
|                                               | N                                              | Median (IQR)     |
| Never                                         | 9                                              | 31.5 (17.3-81.1) |
| Some                                          | 13                                             | 55.6 (42.9-97.3) |
| About half                                    | 5                                              | 69.0 (32.9-81.1) |
| Most of the time                              | 135                                            | 90.4 (64.9-100)  |
| All of the time                               | 186                                            | 100 (87.9-100)   |
| Total                                         | 348                                            | 98.1 (72.1-100)  |

Web Table 7: Odds Ratio of adherence measure with viral failure, N = 331.

| Adherence measure                      | N   | OR for viral failure (95% CI) | AUROC using non-dichotomised measure |
|----------------------------------------|-----|-------------------------------|--------------------------------------|
| 12-month self-report                   |     |                               | 0.619                                |
| Never                                  | 9   | 6.9 (1.4,34.4)                |                                      |
| Some                                   | 13  | 10.9 (2.3,50.8)               |                                      |
| About half                             | 3   | 4.0 (0.4,44.6)                |                                      |
| Most of the time                       | 127 | 1.8 (1.2,2.9)                 |                                      |
| All of the time                        | 179 | 1                             |                                      |
| 12-month pharmacy adherence categories |     |                               | 0.628                                |
| Low                                    | 33  | 4.9 (2.1,11.1)                |                                      |
| Medium                                 | 135 | 1.4 (0.9,2.2)                 |                                      |
| High                                   | 163 | 1                             |                                      |
